# Supplementary material for: GSK3β and ERK regulate the expression of 78 kDa SG2NA and ectopic modulation of its level affects phases of cell cycle
Source: PubMed Central journal article supplement (PMC5548716; doi:10.1038/s41598-017-08085-9), 2017-08-08
Supplement: 41598_2017_8085_MOESM1_ESM.pdf [file 41598_2017_8085_MOESM1_ESM.pdf]

## **GSK3 $\beta$ and ERK regulate the expression of 78kDa SG2NA and ectopic modulation of its level affects phases of cell cycle**

Shweta Pandey, Indrani Talukdar, Buddhi P Jain, **Goutam K Tanti**, and Shyamal K. Goswami

Supplementary Information File.

Supplementary Figure S1: Full length blots for all immunoblots.

Figure 1B

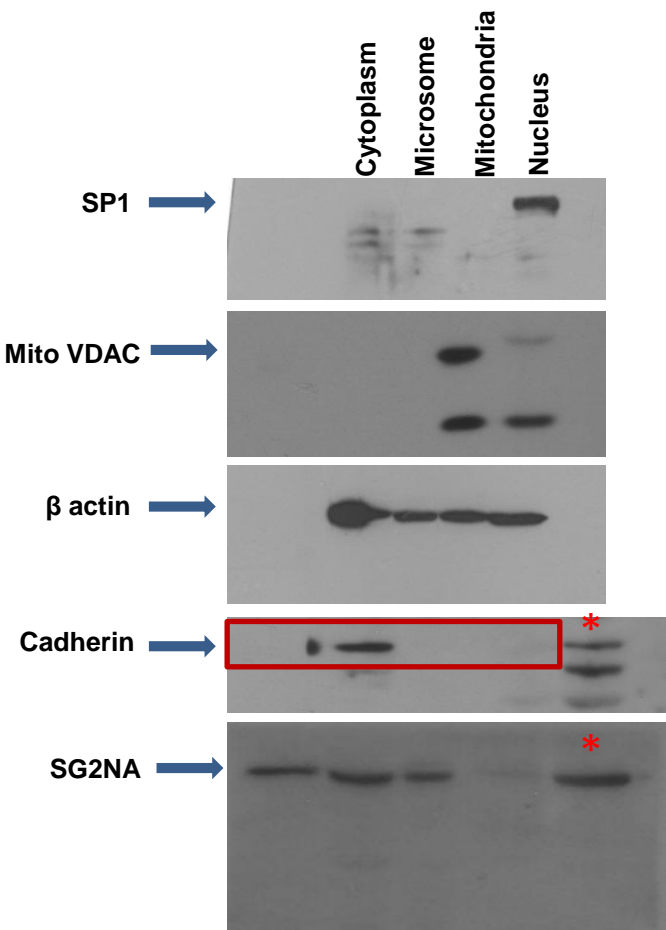

\* is Total cell extract (30%)

Figure 2B

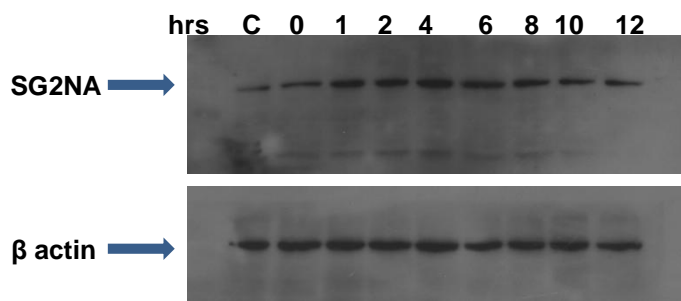

Figure 3B

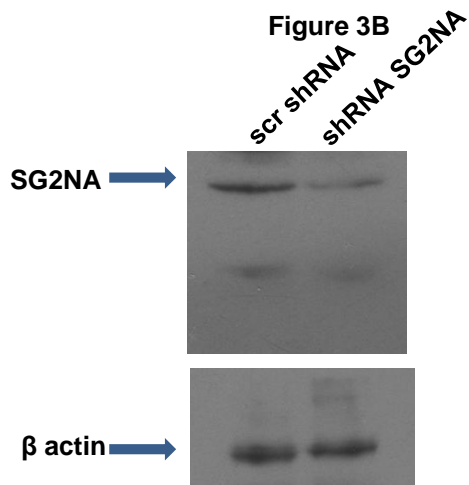

Figure 3A

Clones overexpressing 78kDa SG2NA

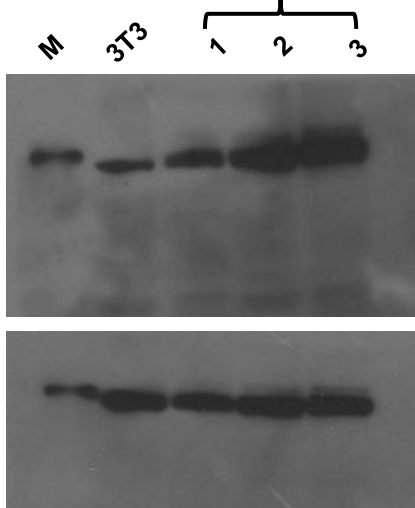

Figure 4A

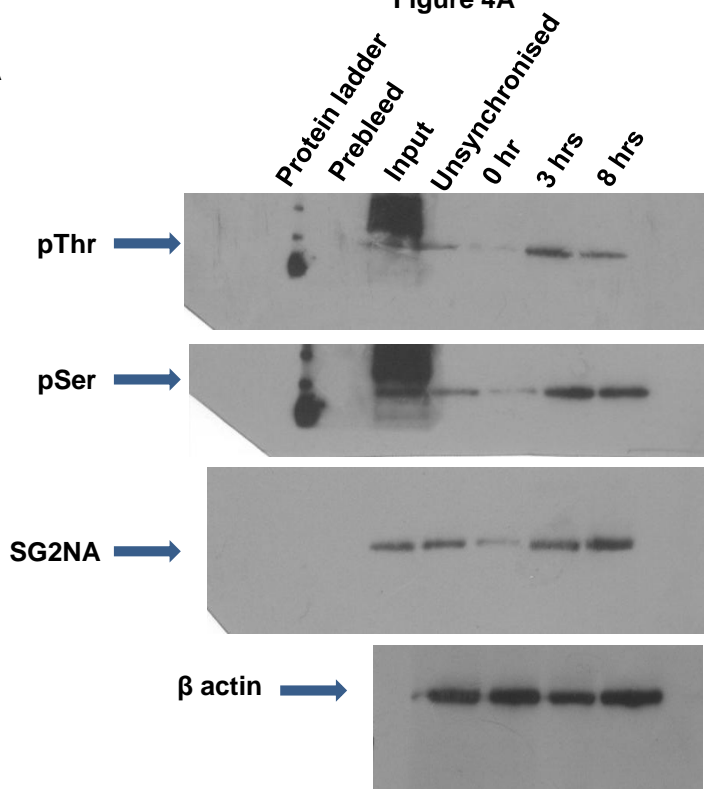

**Figure 4C**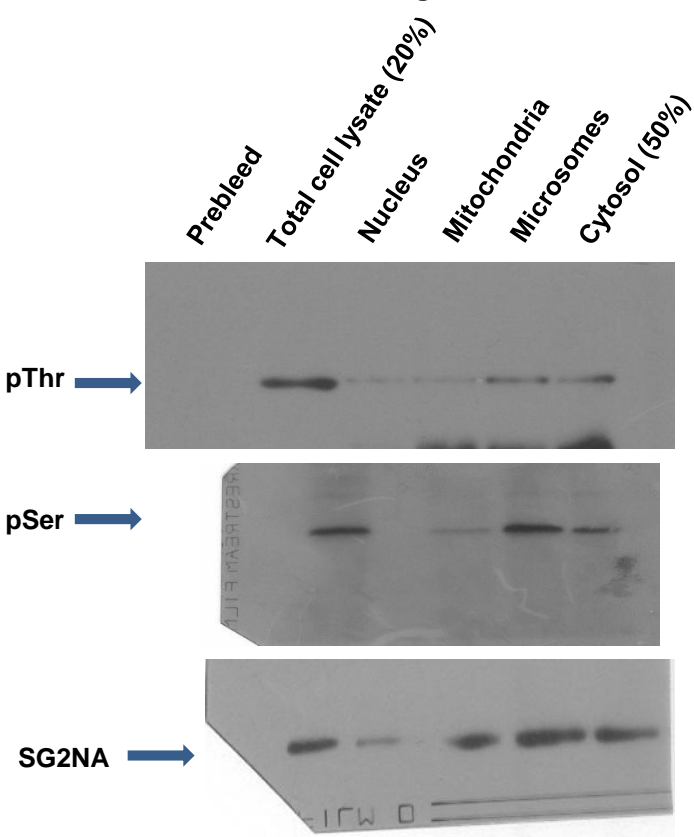**Figure 5A**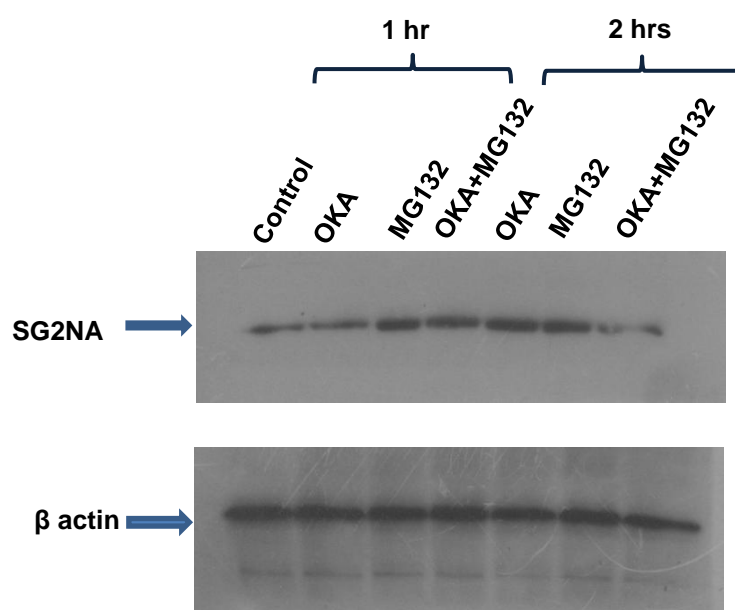**Figure 5C**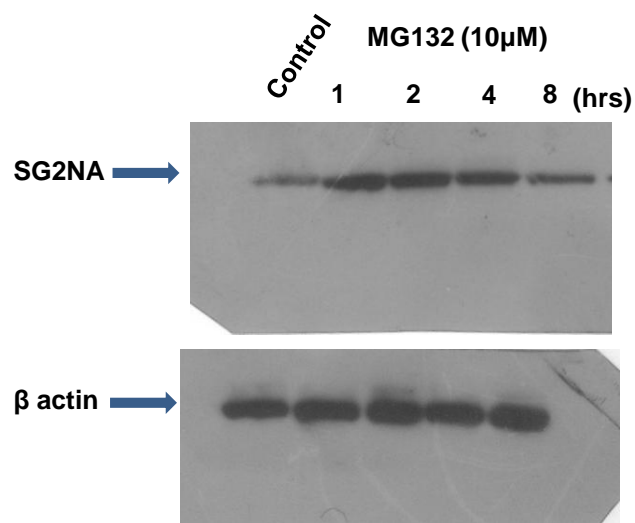**Figure 5E**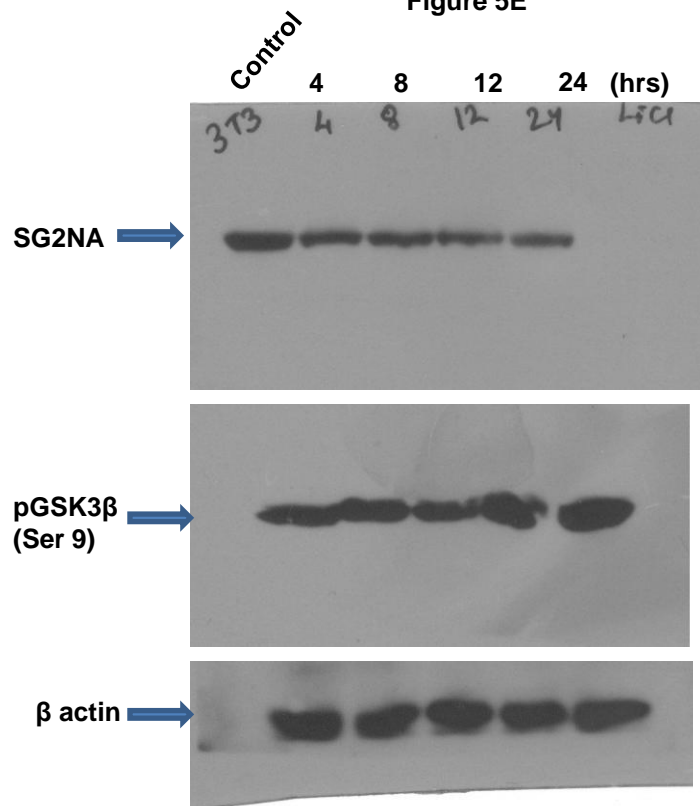**Figure 5H**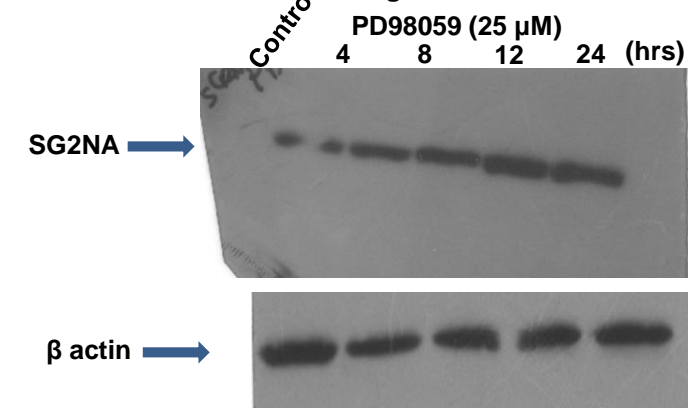

Figure 5K

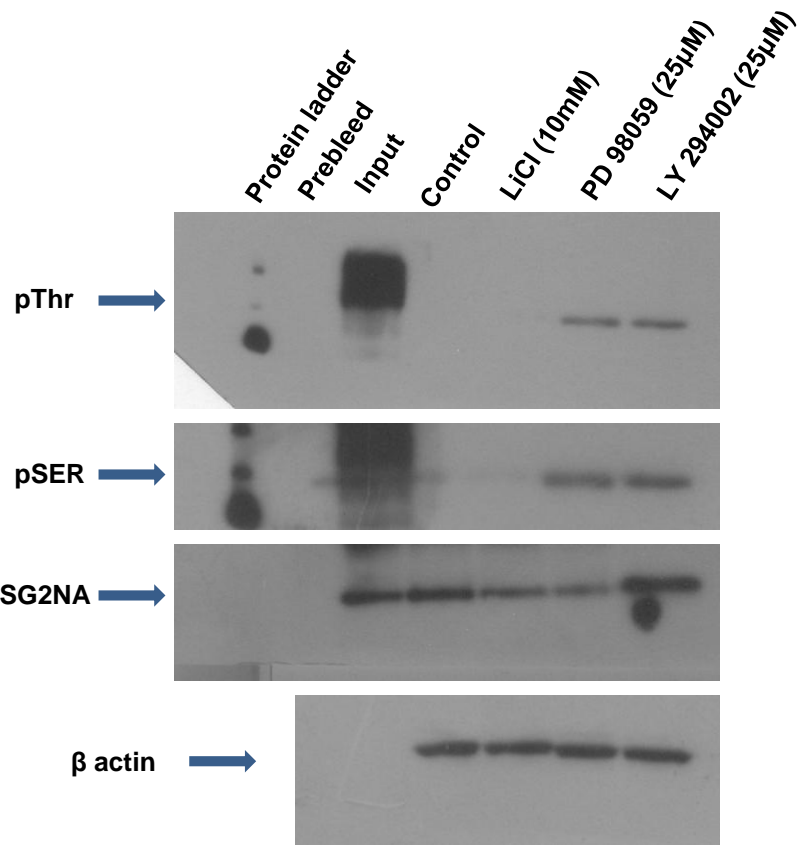

Figure 6A

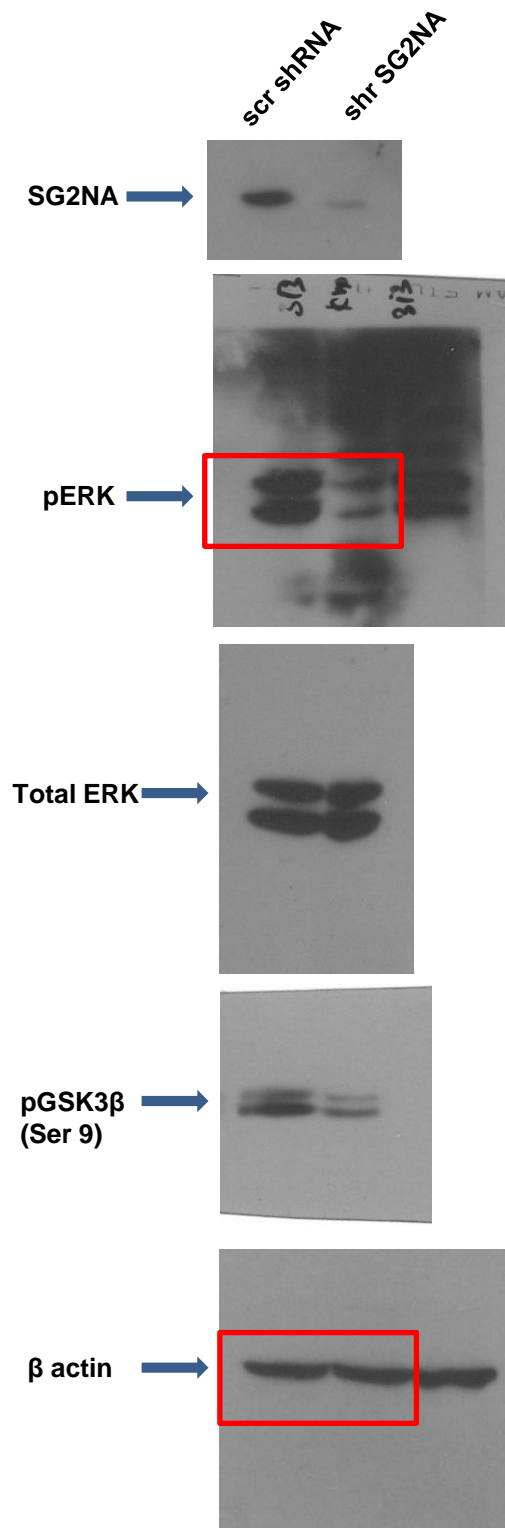

Figure 7A

Clones overexpressing 35kDa SG2NA

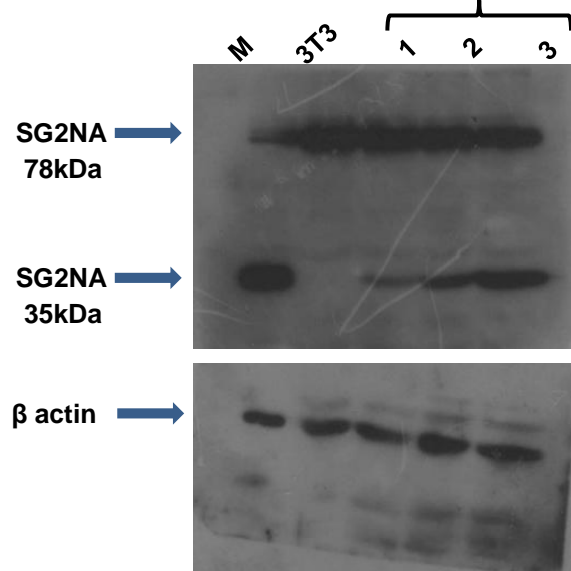

pGSK3β (Ser 9)

β actin
